# Supplementary material for: Multiparametric quantitative phase imaging for real-time, single cell, drug screening in breast cancer
Source: PubMed Central journal article supplement (PMC9360018; doi:10.1038/s42003-022-03759-1), 2022-08-08
Supplement: 42003_2022_3759_MOESM3_ESM.pdf [file 42003_2022_3759_MOESM3_ESM.pdf]

## Description of Additional Supplementary Files

**File name:** Supplementary Data 1

**Description:** All fitting parameters for all conditions and all experiments.

**File name:** Supplementary Data 2

**Description:** All derived response parameters from all conditions and experiments.

**File name:** Supplementary Movie S1

**Description:** Video of entire field of view of individual MDA-MB-231 cells treated with DMSO proliferating throughout the duration of the experiment.

**File name:** Supplementary Movie S2

**Description:** Video of entire field of view of clusters of BT-474 cells treated with DMSO proliferating throughout the duration of the experiment.

**File name:** Supplementary Movie S3

**Description:** Video of entire field of view of clusters of MCF7 cells treated with DMSO proliferating throughout the duration of the experiment.

**File name:** Supplementary Movie S4

**Description:** Video of individual MDA-MB231 cell treated with DMSO.

**File name:** Supplementary Movie S5

**Description:** Video of a cluster of BT-474 cells treated with DMSO.

**File name:** Supplementary Movie S6

**Description:** Video of a cluster of MCF7 cells treated with DMSO.

**File name:** Supplementary Movie S7

**Description:** Video of individual MDA-MB231 cell treated with 2  $\mu$ M doxorubicin.

**File name:** Supplementary Movie S8

**Description:** Video of a cluster of BT-474 cells treated with 2  $\mu$ M doxorubicin.

**File name:** Supplementary Movie S9

**Description:** Video of a cluster of MCF7 cells treated with 20  $\mu$ M fulvestrant.

**File name:** Supplementary Movie S10

**Description:** Video of MDA-MB-231 cell growing despite treatment with 20  $\mu$ M docetaxel.
